# Supplementary material
Source: PubMed Central journal article supplement (PMC4430863)
Supplement: NIHMS685384-supplement-2.pdf [file NIHMS685384-supplement-2.pdf]

## Electronic Supplementary Material

### Sex Differences in the Development of Social Relationships in Rhesus Macaques (*Macaca mulatta*)

Lars Kulik · Federica Amici · Doreen Langos · Anja Widdig

Corresponding author: Lars Kulik, Institute of Biology, Faculty of Bioscience, Pharmacy and Psychology, University of Leipzig, Talstraße 33, 04103 Leipzig, Germany, [lars\\_kulik@eva.mpg.de](mailto:lars_kulik@eva.mpg.de)

#### Appendix S2 Supplementary method descriptions

##### 1. Parentage assignment and determination of kinship

For parental assignment we used the long-term genetic database of the Cayo Santiago population, which was first implemented in 1992 and continuously extended (Kulik *et al.* 2012; Nürnberg *et al.* 1998; Widdig *et al.* 2001, 2006). Nearly the entire population was systematically sampled for individuals born between 1992 and 2000, and for individuals born before 1992 still alive when genetic sampling was started (Widdig unpub. data). Hair, blood, tissue, or fecal samples were collected and used for DNA extraction. We were able to sample all 55 focal subjects plus 445 of all 522 (95.79%) individuals belonging to our study group at any point during our study.

The database from the University of Leipzig (Widdig unpub. data) currently comprises 2404 animals genotyped at  $17.46 \pm 3.51$  loci on average ( $\pm$  SD) out of a total of 23 STR markers.

Using CERVUS 3.0.8 (Kalinowski *et al.* 2007) we calculated the mean number of alleles per locus ( $7.48 \pm 2.63$ ), the mean observed heterozygosity across loci ( $0.73 \pm 0.07$ ), the mean polymorphic information content ( $0.69 \pm 0.08$ ), and the mean expected heterozygosity ( $0.73 \pm 0.06$ ). There was no evidence of null alleles occurring at these loci and all loci were in Hardy-Weinberg equilibrium.

Maternity derived from long-term field observations was genetically tested if a sample was available. For all 55 focal subjects we were able to confirm the behaviorally assigned mother

genetically. For paternity assignment, all males older than 1250 days (based on earliest age at reproduction; Bercovitch *et al.* 2003) and present on the island at least 200 days before a given infant's birth (mean days  $\pm$  SD of gestation length of  $166.5 \pm 7.4$ ) were considered as potential sires for a given infant (mean days  $\pm$  SD of gestation length of  $166.5 \pm 7.4$ ; Silk *et al.* 1993). We were able to sample all potential sires ( $N=167$ ) from the entire island who fulfilled these criteria with respect to our focal cohort, which allowed us to also account for extra group paternity reported for the study population (Widdig *et al.* 2004).

For our 55 focal subjects each mother–father–offspring trio was genotyped at  $16.09 \pm 2.91$  (mean  $\pm$  SD) common loci (and at least at 12 common loci). We determined paternity using a combination of exclusion and likelihood analyses as follows. In 53 cases, all potential sires were excluded on at least two loci, with the exception of the assigned sire, which matched the offspring–mother pair at all loci. In the remaining two cases, the assigned sire had no mismatch with the respective offspring–mother pair, but one other candidate sire could be excluded only at one locus. To confirm assigned paternities derived via exclusion, all paternities were additionally supported at the 95% confidence level in favor of the male with the highest LOD score calculated by CERVUS 3.0 (Kalinowski *et al.* 2007).

We also aimed at assigning the maternal and paternal grandparents to increase the power of our kinship data. We were able to genetically confirm 54 of 55 behavioral maternal grandmothers of our focal subjects; for one behavioral grandmother we lacked a DNA sample. Given that only 1.41% of all behavioral mothers in the database were not confirmed genetically (potentially due to sample swaps, or misidentification of the behavioral mothers in the field, e.g., due to adoption or kidnapping), we felt confident to subsequently use the behaviorally assigned mother/grandmother when missing a DNA sample. Furthermore, we were able to determine 51 of

55 maternal grandfathers, 50 of them by excluding all candidate sires on at least two loci, with the exception of the assigned sire. For one assigned grandfather, one other candidate sire could be excluded only at one locus; however, this grandfather was additionally confirmed at the 95% confidence level. Likewise, we were able to genetically confirm 47 of 55 paternal grandmothers, while for the others we were lacking a DNA sample and therefore subsequently used the behavioral grandmothers. Finally, we were able to determine a total of 50 of 55 paternal grandfathers by excluding all candidate sires on at least two loci, with the exception of the assigned sire. For two additional grandfathers, one other candidate sire could be excluded only at one locus; however, he was additionally confirmed at the 95% confidence level.

We used the same procedure for all sampled potential social partners of our focal subjects ( $N=455$ ). Genetically we were able to confirm 98.90% of behavioral mothers, 82.23% of maternal grandmothers, and 68.95% of paternal grandmothers of the focal partners. Furthermore, we were able to determine 91.43% of fathers, 75.80% of maternal grandfathers, and 69.81% of paternal grandfathers. For those focal partners for which we were lacking a DNA sample we subsequently used the behaviorally assigned mothers/grandmothers. When other potential fathers/grandfathers were excluded with only one mismatch, we were able to confirm the assigned fathers/grandfathers at the 95% confidence level.

Based on the parentage assignments above, we used pedigree information up to the grandparental generation to establish kin relationship for all dyads, including one focal subject and one potential focal partner or two focal subjects, respectively. Restricting the data to those dyads which both partners were present at the same time led to a total of 22,039 unique dyads in our dataset. Full pedigree information up to the grandparent generation comprising 12 IDs per dyad were available for 11,515 dyads. For an additional 4885 dyads with unknown sire/grandsire of an individual we

used an exclusion procedure to ensure that a given dyad was unrelated. In this procedure we first identified all reproductive males (potential sires) on the island at the time of conception (using CPRC census records) of a given individual and then reduced the number by all males excluded as sires based on genotypic data. This provided a list of potential sires that could not be excluded (e.g., due to a lack of samples or power). We then compared the identities of the nonexcluded potential sires of a given subject A with the identities of the assigned sire and grandfathers of a second subject B. If we found no overlap, we considered this dyad unrelated. If an overlap occurred, an expected relatedness was calculated based on the probability of sharing one or several ancestors and accounting for the empirical level of inbreeding avoidance in this population (R script written by Roger Mundry and L. Kulik).

In total we had 16,400 dyads (74.41%) where pedigrees were completely available up to the grandparent generation. The remaining 5639 dyads (25.59%) had gaps in their genealogies, whereby 71.01% were missing only two IDs and we thus kept them in our dataset. Based on the available pedigree information, we could classify 20,872 dyads (94.7 %) either as (1) maternal kin: 794 dyads (3.80%), (2) paternal kin: 907 dyads (4.35%), or (3) nonkin: 19,171 dyads (91.85%). As the remaining dyads were related over both the maternal and paternal line, we excluded them from the analyses for reasons explained elsewhere (Albers and Widdig 2013). As maternal kin we considered dyads that were related only over the maternal line, i.e., dyads that shared the same mother and/or maternal grandmother. We excluded 55 focal–mother dyads from this analysis as offspring–mother bonds represent the strongest social bonds within rhesus groups (Schülke *et al.* 2013). Within our maternal kin, we found 180 half-siblings related at  $r = 0.25$ , 37 grandparent/grandchild dyads related at  $r = 0.25$ , 276 aunt/uncle–nephew/niece dyads related at  $r = 0.125$  and 301 cousins, related at  $r = 0.0625$ . Paternal kin comprised dyads that were related only over the paternal line, i.e., dyads that shared the same father and/or paternal grandfather.

Within paternal kin we determined 50 sire–infant dyads related at  $r = 0.50$  (5 sire–infant dyads were not considered, because the sire was not a group member during our study due to death or migration), 497 half-siblings related at  $r = 0.25$ , 16 grandparent/grandchild dyads related at  $r = 0.25$ , 165 aunt/uncle-nephew/niece dyads related at  $r = 0.125$  and 179 cousins, related at  $r = 0.0625$ . As nonkin we considered all dyads that were not related over both kin lines for a minimum of two generations, i.e., dyads that did not share a common individual among their parents or grandparents.

## References

- Albers, M., & Widdig, A. (2013). The influence of kinship on familiar natal migrant rhesus macaques (*Macaca mulatta*). *International Journal of Primatology*, *34*, 99–114.
- Bercovitch, F. B., Widdig, A., Trefilov, A., Kessler, M. J., Berard, J. D., Schmidtke, J., Nurnberg, P., & M. Krawczak. (2003). A longitudinal study of age-specific reproductive output and body condition among male rhesus macaques, *Macaca mulatta*. *Naturwissenschaften*, *90*, 309–312.
- Burnham, K. P., & Anderson, D. R. (2002). *Model selection and multimodel inference : a practical information-theoretic approach*. New York: Springer US.
- Kalinowski, S. T., Taper, M. L., & Marshall, T. C. (2007). Revising how the computer program CERVUS accommodates genotyping error increases success in paternity assignment. *Molecular Ecology*, *16*, 1099–1106.
- Kulik, L., Muniz, L., Mundry, R., & Widdig, A. (2012). Patterns of interventions and the effect of coalitions and sociality on male fitness. *Molecular Ecology*, *21*, 699–714.
- Nürnberg, P., Sauermann, U., Kayser, M., Lanfer, C., Manz, E., Widdig, A., Berard, J. D., Bercovitch, F. B., Kessler, M., Schmidtke, J., & Krawczak, M. (1998). Paternity assessment in rhesus macaques (*Macaca mulatta*): Multilocus DNA fingerprinting and PCR marker typing. *American Journal of Primatology*, *44*, 1–18.
- Schielzeth, H. (2010). Simple means to improve the interpretability of regression coefficients. *Methods in Ecology and Evolution*, *1*, 103–113.
- Schülke, O., Wenzel, S., & Ostner, J. (2013). Paternal relatedness predicts the strength of social bonds among female rhesus macaques. *PLoS ONE*, *8*, e59789.
- Silk, J. B., Short, J., Roberts, J., & Kusnitz, J. (1993). Gestation length in rhesus macaques (*Macaca mulatta*). *International Journal of Primatology*, *14*, 95–104.
- Widdig, A., Bercovitch, F. B., Streich, W. J., Sauermann, U., Nürnberg, P., & Krawczak, M. (2004). A longitudinal analysis of reproductive skew in male rhesus macaques. *Proceedings of the Royal Society of London B: Biological Sciences*, *271*, 819–826.

Widdig, A., Nürnberg, P., Krawczak, M., Streich, W. J., & Bercovitch, F. B. (2001). Paternal relatedness and age proximity regulate social relationships among adult female rhesus macaques. *Proceedings of the National Academy of Sciences of the United States of America*, *98*, 13769–13773.

Widdig, A., Streich, W. J., Nürnberg, P., Croucher, P. J. P., Bercovitch, F. B., & Krawczak, M. (2006). Paternal kin bias in the agonistic interventions of adult female rhesus macaques (*Macaca mulatta*). *Behavioral Ecology and Sociobiology*, *61*, 205–214.

## 2. Computing the Autocorrelation terms

To compute the ac terms, we first fitted the previously described model to derive the residuals. We then averaged the residuals of all other data points, separately for each data point and for each focal and partner, with the contribution of the residuals being weighted by their time lag to the particular data point. The weight for these averages followed a normal distribution with a mean of zero. Their standard deviations were simultaneously determined by maximizing the likelihood of the model including the two ac terms. The calculation was done using an R function written by Roger Mundry. The minimization of the Akaike's Information Criterion (AIC) (Burnham and Anderson 2002) to find the best fitting standard deviations of the weighted function for the ac terms was done using the R function “optim” from the package “stats”. Before running the model, we z-transformed all the covariates (including the autocorrelation term) to a mean of zero and a standard deviation of one (Schielzeth 2010).

## References

- Albers, M., & Widdig, A. (2013). The influence of kinship on familiar natal migrant rhesus macaques (*Macaca mulatta*). *International Journal of Primatology*, *34*, 99–114.
- Bercovitch, F. B., Widdig, A., Trefilov, A., Kessler, M. J., Berard, J. D., Schmidtke, J., Nurnberg, P., & M. Krawczak. (2003). A longitudinal study of age-specific reproductive output and body condition among male rhesus macaques, *Macaca mulatta*. *Naturwissenschaften*, *90*, 309–312.
- Burnham, K. P., & Anderson, D. R. (2002). *Model selection and multimodel inference : a practical information-theoretic approach*. New York: Springer US.
- Kalinowski, S. T., Taper, M. L., & Marshall, T. C. (2007). Revising how the computer program CERVUS accommodates genotyping error increases success in paternity assignment. *Molecular Ecology*, *16*, 1099–1106.

- Kulik, L., Muniz, L., Mundry, R., & Widdig, A. (2012). Patterns of interventions and the effect of coalitions and sociality on male fitness. *Molecular Ecology*, *21*, 699–714.
- Nürnberg, P., Sauermann, U., Kayser, M., Lanfer, C., Manz, E., Widdig, A., Berard, J. D., Bercovitch, F. B., Kessler, M., Schmidtke, J., & Krawczak, M. (1998). Paternity assessment in rhesus macaques (*Macaca mulatta*): Multilocus DNA fingerprinting and PCR marker typing. *American Journal of Primatology*, *44*, 1–18.
- Schielezeth, H. (2010). Simple means to improve the interpretability of regression coefficients. *Methods in Ecology and Evolution*, *1*, 103–113.
- Schülke, O., Wenzel, S., & Ostner, J. (2013). Paternal relatedness predicts the strength of social bonds among female rhesus macaques. *PLoS ONE*, *8*, e59789.
- Silk, J. B., Short, J., Roberts, J., & Kusnitz, J. (1993). Gestation length in rhesus macaques (*Macaca mulatta*). *International Journal of Primatology*, *14*, 95–104.
- Widdig, A., Bercovitch, F. B., Streich, W. J., Sauermann, U., Nürnberg, P., & Krawczak, M. (2004). A longitudinal analysis of reproductive skew in male rhesus macaques. *Proceedings of the Royal Society of London B: Biological Sciences*, *271*, 819–826.
- Widdig, A., Nürnberg, P., Krawczak, M., Streich, W. J., & Bercovitch, F. B. (2001). Paternal relatedness and age proximity regulate social relationships among adult female rhesus macaques. *Proceedings of the National Academy of Sciences of the United States of America*, *98*, 13769–13773.
- Widdig, A., Streich, W. J., Nürnberg, P., Croucher, P. J. P., Bercovitch, F. B., & Krawczak, M. (2006). Paternal kin bias in the agonistic interventions of adult female rhesus macaques (*Macaca mulatta*). *Behavioral Ecology and Sociobiology*, *61*, 205–214.
