# Supplementary material
Source: PubMed Central journal article supplement (PMC4430863)
Supplement: NIHMS685384-supplement-3.pdf [file NIHMS685384-supplement-3.pdf]

## **Electronic Supplementary Material**

### **Sex Differences in the Development of Social Relationships in Rhesus Macaques (*Macaca mulatta*)**

**Lars Kulik · Federica Amici · Doreen Langos · Anja Widdig**

Corresponding author: Lars Kulik, Institute of Biology, Faculty of Bioscience, Pharmacy and Psychology, University of Leipzig, Talstraße 33, 04103 Leipzig, Germany, [lars\\_kulik@eva.mpg.de](mailto:lars_kulik@eva.mpg.de)

### **Appendix S3 Model result tables**

**Table SI** Results of GLMM for the probability of spatial proximity between focal and partner

| Term                                                                        | Estimate | SE   | $\chi^2$ | d.f. | P       |
|-----------------------------------------------------------------------------|----------|------|----------|------|---------|
| (Intercept)                                                                 | -1.95    | 0.07 | a        | a    | a       |
| ac1 <sup>c</sup>                                                            | 0.15     | 0.01 | 751.330  | 1    | < 0.001 |
| ac2 <sup>c</sup>                                                            | 0.12     | 0.00 | 1866.800 | 1    | < 0.001 |
| N of maternal kin per day <sup>b,c</sup>                                    | -0.04    | 0.02 | 2.321    | 1    | 0.128   |
| Group size per day <sup>c</sup>                                             | -0.04    | 0.01 | 30.080   | 1    | < 0.001 |
| Sex ratio per day <sup>c</sup>                                              | 0.05     | 0.01 | 23.528   | 1    | < 0.001 |
| Mother present (yes=1; no=0)                                                | -0.11    | 0.07 | a        | a    | a       |
| Focal age <sup>c</sup>                                                      | 0.49     | 0.02 | a        | a    | a       |
| Focal age <sup>2c</sup>                                                     | -0.40    | 0.02 | a        | a    | a       |
| Focal sex (♀=0; ♂=1)                                                        | 0.11     | 0.03 | a        | a    | a       |
| Partner rank <sup>c</sup>                                                   | -0.23    | 0.03 | a        | a    | a       |
| Partner rank <sup>c</sup>                                                   | -0.05    | 0.02 | a        | a    | a       |
| Partner sex (♀=0; ♂=1)                                                      | -0.75    | 0.07 | a        | a    | a       |
| Age difference <sup>c</sup>                                                 | 0.10     | 0.02 | a        | a    | a       |
| Kin (maternal, nonkin)                                                      | -3.10    | 0.02 | a        | a    | a       |
| Kin (maternal, paternal)                                                    | -3.01    | 0.05 | a        | a    | a       |
| Focal sex (♀=0; ♂=1):mother present (yes=1; no=0)                           | -0.37    | 0.03 | a        | a    | a       |
| Focal sex (♀=0; ♂=1):partner rank <sup>c</sup>                              | -0.07    | 0.02 | a        | a    | a       |
| Focal sex (♀=0; ♂=1):age difference <sup>b,c</sup>                          | 0.06     | 0.02 | a        | a    | a       |
| Focal sex (♀=0; ♂=1):kin (maternal, nonkin)                                 | -0.16    | 0.03 | a        | a    | a       |
| Focal sex (♀=0; ♂=1):kin (maternal, paternal)                               | 0.03     | 0.08 | a        | a    | a       |
| Focal sex (♀=0; ♂=1):partner sex (♀=0; ♂=1)                                 | 0.61     | 0.03 | a        | a    | a       |
| Focal age <sup>c</sup> :focal sex (♀=0; ♂=1)                                | -0.21    | 0.03 | a        | a    | a       |
| Focal age <sup>2c</sup> :focal sex (♀=0; ♂=1)                               | -0.15    | 0.03 | a        | a    | a       |
| Focal age <sup>c</sup> :mother present (yes=1; no=0)                        | -1.04    | 0.02 | a        | a    | a       |
| Focal age <sup>2c</sup> :mother present (yes=1; no=0)                       | 0.42     | 0.02 | a        | a    | a       |
| Focal age <sup>c</sup> :partner rank <sup>c</sup>                           | -0.02    | 0.01 | a        | a    | a       |
| Focal age <sup>2c</sup> :partner rank <sup>c</sup>                          | 0.00     | 0.01 | a        | a    | a       |
| Focal age <sup>c</sup> :age difference <sup>b,c</sup>                       | 0.01     | 0.01 | a        | a    | a       |
| Focal age <sup>2c</sup> :age difference <sup>b,c</sup>                      | 0.01     | 0.01 | a        | a    | a       |
| Focal age <sup>c</sup> :focal rank <sup>c</sup>                             | 0.07     | 0.01 | 124.080  | 2    | < 0.001 |
| Focal age <sup>2c</sup> :focal rank <sup>c</sup>                            | -0.03    | 0.01 |          |      |         |
| Focal age <sup>c</sup> :kin (maternal, nonkin)                              | -0.12    | 0.02 | a        | a    | a       |
| Focal age <sup>2c</sup> :kin (maternal, nonkin)                             | 0.13     | 0.02 | a        | a    | a       |
| Focal age <sup>c</sup> :kin (maternal, paternal)                            | 0.00     | 0.04 | a        | a    | a       |
| Focal age <sup>2c</sup> :kin (maternal, paternal)                           | 0.00     | 0.04 | a        | a    | a       |
| Focal age <sup>c</sup> :partner sex (♀=0; ♂=1)                              | 0.13     | 0.02 | a        | a    | a       |
| Focal age <sup>2c</sup> :partner sex (♀=0; ♂=1)                             | -0.02    | 0.02 | a        | a    | a       |
| Focal age <sup>c</sup> :focal sex (♀=0; ♂=1):mother present (yes=1; no=0)   | -0.37    | 0.03 | 197.800  | 2    | < 0.001 |
| Focal age <sup>2c</sup> :focal sex (♀=0; ♂=1):mother present (yes=1; no=0)  | 0.10     | 0.03 |          |      |         |
| Focal age <sup>c</sup> :focal sex (♀=0; ♂=1):partner rank <sup>c</sup>      | 0.00     | 0.01 | 7.309    | 2    | 0.026   |
| Focal age <sup>2c</sup> :focal sex (♀=0; ♂=1):partner rank <sup>c</sup>     | 0.03     | 0.01 |          |      |         |
| Focal age <sup>c</sup> :focal sex (♀=0; ♂=1):age difference <sup>b,c</sup>  | -0.03    | 0.01 | 48.634   | 2    | < 0.001 |
| Focal age <sup>2c</sup> :focal sex (♀=0; ♂=1):age difference <sup>b,c</sup> | -0.08    | 0.01 |          |      |         |
| Focal age <sup>c</sup> :focal sex (♀=0; ♂=1):kin (maternal, nonkin)         | 0.02     | 0.02 | 13.515   | 4    | 0.009   |
| Focal age <sup>2c</sup> :focal sex (♀=0; ♂=1):kin (maternal, nonkin)        | -0.05    | 0.03 |          |      |         |
| Focal age <sup>c</sup> :focal sex (♀=0; ♂=1):kin (maternal, paternal)       | 0.07     | 0.06 |          |      |         |
| Focal age <sup>2c</sup> :focal sex (♀=0; ♂=1):kin (maternal, paternal)      | 0.11     | 0.06 |          |      |         |
| Focal age <sup>c</sup> :focal sex (♀=0; ♂=1):partner sex (♀=0; ♂=1)         | 0.47     | 0.02 | 434.160  | 2    | < 0.001 |
| Focal age <sup>2c</sup> :focal sex (♀=0; ♂=1):partner sex (♀=0; ♂=1)        | 0.05     | 0.03 |          |      |         |

<sup>a</sup> Not shown because lacking a meaningful interpretation.

<sup>b</sup> Square root transformed prior to being z-transformed.

<sup>c</sup> Predictors were z-transformed to a mean=0 and SD=1.

**Table SII** Results of GLMM for the probability of grooming between focal and partner

| Term                                                                        | Estimate | SE   | $\chi^2$ | d.f. | P       |
|-----------------------------------------------------------------------------|----------|------|----------|------|---------|
| (Intercept)                                                                 | -4.21    | 0.11 | a        | a    | a       |
| ac1 <sup>c</sup>                                                            | 0.10     | 0.02 | 24.035   | 1    | < 0.001 |
| ac2 <sup>c</sup>                                                            | 0.04     | 0.00 | 116.600  | 1    | < 0.001 |
| N of maternal kin per day <sup>b,c</sup>                                    | -0.27    | 0.04 | 28.916   | 1    | < 0.001 |
| Group size per day <sup>c</sup>                                             | 0.14     | 0.02 | 39.911   | 1    | < 0.001 |
| Sex ratio per day <sup>c</sup>                                              | -0.05    | 0.04 | 1.418    | 1    | 0.234   |
| Mother present (yes=1; no=0)                                                | -0.04    | 0.08 | a        | a    | a       |
| Focal age <sup>c</sup>                                                      | 0.94     | 0.07 | a        | a    | a       |
| Focal age <sup>2c</sup>                                                     | -0.37    | 0.06 | a        | a    | a       |
| Focal sex (♀=0; ♂=1)                                                        | -0.19    | 0.13 | a        | a    | a       |
| Focal rank <sup>c</sup>                                                     | 0.00     | 0.07 | a        | a    | a       |
| Partner rank <sup>c</sup>                                                   | -0.04    | 0.05 | 0.674    | 1    | 0.412   |
| Partner sex (♀=0; ♂=1)                                                      | -0.82    | 0.14 | a        | a    | a       |
| Age difference <sup>c</sup>                                                 | -0.33    | 0.07 | a        | a    | a       |
| Kin (maternal, nonkin)                                                      | -4.17    | 0.08 | a        | a    | a       |
| Kin (maternal, paternal)                                                    | -4.22    | 0.23 | a        | a    | a       |
| Focal sex (♀=0; ♂=1):mother present (yes=1; no=0)                           | -0.85    | 0.12 | a        | a    | a       |
| Focal sex (♀=0; ♂=1):age difference <sup>b,c</sup>                          | 0.32     | 0.07 | a        | a    | a       |
| Focal sex (♀=0; ♂=1):focal rank <sup>c</sup>                                | 0.06     | 0.10 | a        | a    | a       |
| Focal sex (♀=0; ♂=1):kin (maternal, nonkin)                                 | -0.14    | 0.10 | 9.077    | 2    | 0.011   |
| Focal sex (♀=0; ♂=1):kin (maternal, paternal)                               | 0.55     | 0.25 |          |      |         |
| Focal sex (♀=0; ♂=1):partner sex (♀=0; ♂=1)                                 | 1.16     | 0.14 | a        | a    | a       |
| Focal age <sup>c</sup> :focal sex (♀=0; ♂=1)                                | -0.29    | 0.09 | a        | a    | a       |
| Focal age <sup>2c</sup> :focal sex (♀=0; ♂=1)                               | -0.24    | 0.08 | a        | a    | a       |
| Focal age <sup>c</sup> :mother present (yes=1; no=0)                        | -0.60    | 0.07 | a        | a    | a       |
| Focal age <sup>2c</sup> :mother present (yes=1; no=0)                       | -0.07    | 0.07 | a        | a    | a       |
| Focal age <sup>c</sup> :age difference <sup>b,c</sup>                       | -0.04    | 0.04 | a        | a    | a       |
| Focal age <sup>2c</sup> :age difference <sup>b,c</sup>                      | 0.14     | 0.04 | a        | a    | a       |
| Focal age <sup>c</sup> :focal rank <sup>c</sup>                             | 0.10     | 0.04 | a        | a    | a       |
| Focal age <sup>2c</sup> :focal rank <sup>c</sup>                            | 0.01     | 0.03 | a        | a    | a       |
| Focal age <sup>c</sup> :kin (maternal, nonkin)                              | -0.01    | 0.06 | 24.455   | 4    | < 0.001 |
| Focal age <sup>2c</sup> :kin (maternal, nonkin)                             | 0.18     | 0.05 |          |      |         |
| Focal age <sup>c</sup> :kin (maternal, paternal)                            | 0.51     | 0.20 |          |      |         |
| Focal age <sup>2c</sup> :kin (maternal, paternal)                           | -0.14    | 0.17 |          |      |         |
| Focal age <sup>c</sup> :partner sex (♀=0; ♂=1)                              | 0.35     | 0.10 | a        | a    | a       |
| Focal age <sup>2c</sup> :partner sex (♀=0; ♂=1)                             | -0.11    | 0.09 | a        | a    | a       |
| Focal age <sup>c</sup> :focal sex (♀=0; ♂=1):mother present (yes=1; no=0)   | -0.71    | 0.11 | 41.584   | 2    | < 0.001 |
| Focal age <sup>2c</sup> :focal sex (♀=0; ♂=1):mother present (yes=1; no=0)  | 0.26     | 0.11 |          |      |         |
| Focal age <sup>c</sup> :focal sex (♀=0; ♂=1):age difference <sup>b,c</sup>  | 0.09     | 0.06 | 10.672   | 2    | 0.005   |
| Focal age <sup>2c</sup> :focal sex (♀=0; ♂=1):age difference <sup>b,c</sup> | -0.18    | 0.06 |          |      |         |
| Focal age <sup>c</sup> :focal sex (♀=0; ♂=1):focal rank <sup>c</sup>        | -0.14    | 0.06 | 6.492    | 2    | 0.039   |
| Focal age <sup>2c</sup> :focal sex (♀=0; ♂=1):focal rank <sup>c</sup>       | 0.02     | 0.05 |          |      |         |
| Focal age <sup>c</sup> :focal sex (♀=0; ♂=1):partner sex (♀=0; ♂=1)         | 0.63     | 0.13 | 27.236   | 2    | < 0.001 |
| Focal age <sup>2c</sup> :focal sex (♀=0; ♂=1):partner sex (♀=0; ♂=1)        | -0.15    | 0.12 |          |      |         |

<sup>a</sup> Not shown because lacking a meaningful interpretation.

<sup>b</sup> Square root transformed prior to being z-transformed.

<sup>c</sup> Predictors were z-transformed to a mean=0 and SD=1.

**Table SIII** Results of GLMM for the probability of play between focal and partner

| Term                                                                                    | Estimate | SE   | $\chi^2$     | d.f.         | P            |
|-----------------------------------------------------------------------------------------|----------|------|--------------|--------------|--------------|
| (Intercept)                                                                             | -4.95    | 0.15 | <sup>a</sup> | <sup>a</sup> | <sup>a</sup> |
| ac1 <sup>c</sup>                                                                        | 0.29     | 0.02 | 239.440      | 2            | < 0.001      |
| ac2 <sup>c</sup>                                                                        | 0.04     | 0.00 | 121.260      | 2            | < 0.001      |
| N of maternal kin per day <sup>b,c</sup>                                                | -0.31    | 0.05 | 35.208       | 2            | < 0.001      |
| Group size per day <sup>c</sup>                                                         | -0.04    | 0.02 | 3.940        | 2            | 0.140        |
| Sex ratio per day <sup>c</sup>                                                          | -0.05    | 0.05 | 2.912        | 2            | 0.233        |
| Mother present (yes=1; no=0)                                                            | -1.28    | 0.10 | <sup>a</sup> | <sup>a</sup> | <sup>a</sup> |
| Focal age <sup>c</sup>                                                                  | 0.29     | 0.10 | <sup>a</sup> | <sup>a</sup> | <sup>a</sup> |
| Focal age <sup>2</sup> <sup>c</sup>                                                     | -0.89    | 0.11 | <sup>a</sup> | <sup>a</sup> | <sup>a</sup> |
| Focal sex (♀=0; ♂=1)                                                                    | -1.24    | 0.19 | <sup>a</sup> | <sup>a</sup> | <sup>a</sup> |
| Focal rank <sup>c</sup>                                                                 | 0.23     | 0.10 | <sup>a</sup> | <sup>a</sup> | <sup>a</sup> |
| Partner rank <sup>c</sup>                                                               | 0.21     | 0.06 | <sup>a</sup> | <sup>a</sup> | <sup>a</sup> |
| Partner sex (♀=0; ♂=1)                                                                  | -0.53    | 0.14 | <sup>a</sup> | <sup>a</sup> | <sup>a</sup> |
| Age difference <sup>c</sup>                                                             | -1.73    | 0.13 | <sup>a</sup> | <sup>a</sup> | <sup>a</sup> |
| Kin (maternal, nonkin)                                                                  | -4.19    | 0.09 | <sup>a</sup> | <sup>a</sup> | <sup>a</sup> |
| Kin (maternal, paternal)                                                                | -4.03    | 0.21 | <sup>a</sup> | <sup>a</sup> | <sup>a</sup> |
| Focal sex (♀=0; ♂=1):mother present (yes=1; no=0)                                       | -0.67    | 0.14 | <sup>a</sup> | <sup>a</sup> | <sup>a</sup> |
| Focal sex (♀=0; ♂=1):age difference <sup>b,c</sup>                                      | -0.66    | 0.15 | <sup>a</sup> | <sup>a</sup> | <sup>a</sup> |
| Focal sex (♀=0; ♂=1):focal rank <sup>c</sup>                                            | -0.19    | 0.12 | <sup>a</sup> | <sup>a</sup> | <sup>a</sup> |
| Focal sex (♀=0; ♂=1):kin (maternal, nonkin)                                             | 0.28     | 0.10 | 33.016       | 2            | < 0.001      |
| Focal sex (♀=0; ♂=1):kin (maternal, paternal)                                           | 1.18     | 0.22 |              |              |              |
| Focal sex (♀=0; ♂=1):partner sex (♀=0; ♂=1)                                             | 1.84     | 0.14 | <sup>a</sup> | <sup>a</sup> | <sup>a</sup> |
| Focal age <sup>c</sup> :focal sex (♀=0; ♂=1)                                            | -0.83    | 0.13 | <sup>a</sup> | <sup>a</sup> | <sup>a</sup> |
| Focal age <sup>2</sup> <sup>c</sup> :focal sex (♀=0; ♂=1)                               | 0.51     | 0.14 | <sup>a</sup> | <sup>a</sup> | <sup>a</sup> |
| Focal age <sup>c</sup> :mother present (yes=1; no=0)                                    | -0.92    | 0.09 | <sup>a</sup> | <sup>a</sup> | <sup>a</sup> |
| Focal age <sup>2</sup> <sup>c</sup> :mother present (yes=1; no=0)                       | 0.70     | 0.10 | <sup>a</sup> | <sup>a</sup> | <sup>a</sup> |
| Focal age <sup>c</sup> :partner rank <sup>c</sup>                                       | 0.09     | 0.03 | 14.349       | 2            | 0.001        |
| Focal age <sup>2</sup> <sup>c</sup> :partner rank <sup>c</sup>                          | -0.10    | 0.03 |              |              |              |
| Focal age <sup>c</sup> :age difference <sup>b,c</sup>                                   | 0.72     | 0.09 | <sup>a</sup> | <sup>a</sup> | <sup>a</sup> |
| Focal age <sup>2</sup> <sup>c</sup> :age difference <sup>b,c</sup>                      | -0.12    | 0.10 | <sup>a</sup> | <sup>a</sup> | <sup>a</sup> |
| Focal age <sup>c</sup> :focal rank <sup>c</sup>                                         | 0.16     | 0.05 | <sup>a</sup> | <sup>a</sup> | <sup>a</sup> |
| Focal age <sup>2</sup> <sup>c</sup> :focal rank <sup>c</sup>                            | -0.20    | 0.05 | <sup>a</sup> | <sup>a</sup> | <sup>a</sup> |
| Focal age <sup>c</sup> :kin (maternal, nonkin)                                          | 0.17     | 0.05 | 29.894       | 4            | < 0.001      |
| Focal age <sup>2</sup> <sup>c</sup> :kin (maternal, nonkin)                             | 0.16     | 0.06 |              |              |              |
| Focal age <sup>c</sup> :kin (maternal, paternal)                                        | 0.38     | 0.10 |              |              |              |
| Focal age <sup>2</sup> <sup>c</sup> :kin (maternal, paternal)                           | -0.02    | 0.11 |              |              |              |
| Focal age <sup>c</sup> :partner sex (♀=0; ♂=1)                                          | 0.64     | 0.09 | <sup>a</sup> | <sup>a</sup> | <sup>a</sup> |
| Focal age <sup>2</sup> <sup>c</sup> :partner sex (♀=0; ♂=1)                             | 0.01     | 0.10 | <sup>a</sup> | <sup>a</sup> | <sup>a</sup> |
| Focal age <sup>c</sup> :focal sex (♀=0; ♂=1):mother present (yes=1; no=0)               | -0.53    | 0.12 | 20.174       | 2            | < 0.001      |
| Focal age <sup>2</sup> <sup>c</sup> :focal sex (♀=0; ♂=1):mother present (yes=1; no=0)  | -0.06    | 0.13 |              |              |              |
| Focal age <sup>c</sup> :focal sex (♀=0; ♂=1):age difference <sup>b,c</sup>              | -0.89    | 0.11 | 60.390       | 2            | < 0.001      |
| Focal age <sup>2</sup> <sup>c</sup> :focal sex (♀=0; ♂=1):age difference <sup>b,c</sup> | 0.18     | 0.12 |              |              |              |
| Focal age <sup>c</sup> :focal sex (♀=0; ♂=1):focal rank <sup>c</sup>                    | -0.20    | 0.06 | 11.352       | 2            | 0.003        |
| Focal age <sup>2</sup> <sup>c</sup> :focal sex (♀=0; ♂=1):focal rank <sup>c</sup>       | 0.18     | 0.06 |              |              |              |
| Focal age <sup>c</sup> :focal sex (♀=0; ♂=1):partner sex (♀=0; ♂=1)                     | 0.61     | 0.12 | 32.189       | 2            | < 0.001      |
| Focal age <sup>2</sup> <sup>c</sup> :focal sex (♀=0; ♂=1):partner sex (♀=0; ♂=1)        | -0.25    | 0.12 |              |              |              |

<sup>a</sup> Not shown because lacking a meaningful interpretation.<sup>b</sup> Square root transformed prior to being z-transformed.<sup>c</sup> Predictors were z-transformed to a mean=0 and SD=1.
